# Supplementary material
Source: publisher figshare collection journal article supplement (https://frontiersin.figshare.com/ndownloader/files/13699169)

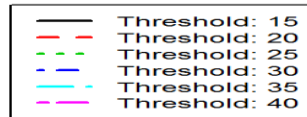

**Supplemental Figure 6. The Sensitivity (Se), Specificity (Sp), Positive Predictive value (PPV), Negative Predictive value (NNV) ,Likelihood Ratios +’ve (LR+) and Likelihood Ratios -’ve (LR-) for the 15, 20, 25, 30, 35 and 40 mIU/ml thresholds across the menstrual cycle**

**Ovulation within 24**  
**Number of positives: 1**

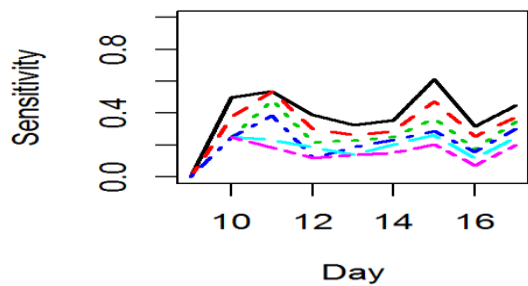

**Ovulation within 24**  
**Number of positives: 2**

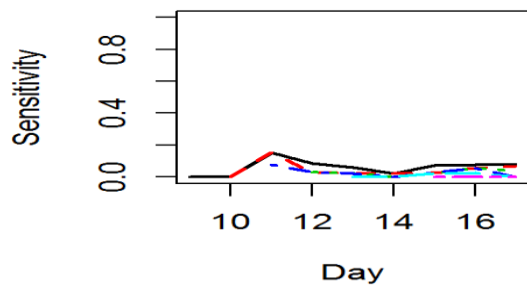

**Ovulation within 24**  
**Number of positives: 3**

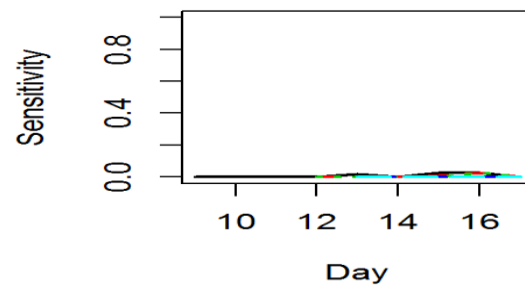

**Ovulation within 48**  
**Number of positives: 1**

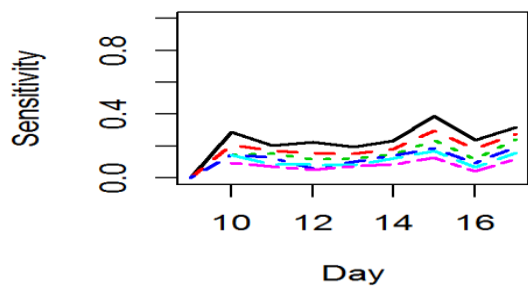

**Ovulation within 48**  
**Number of positives: 2**

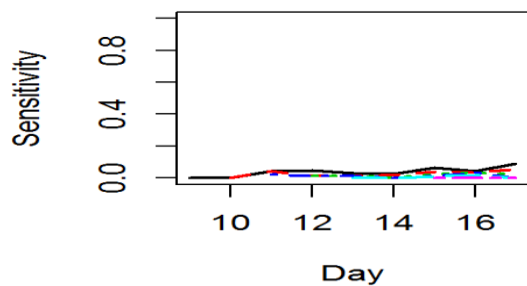

**Ovulation within 48**  
**Number of positives: 3**

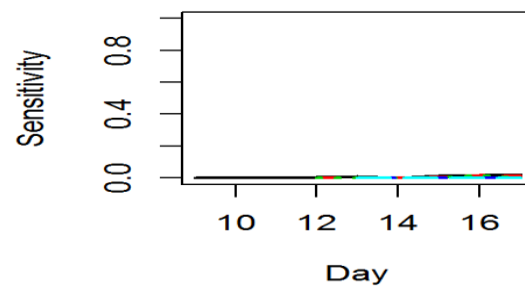

**Ovulation within 72**  
**Number of positives: 1**

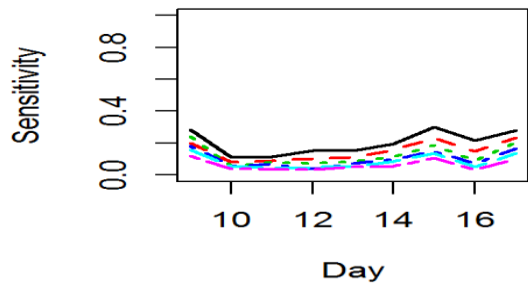

**Ovulation within 72**  
**Number of positives: 2**

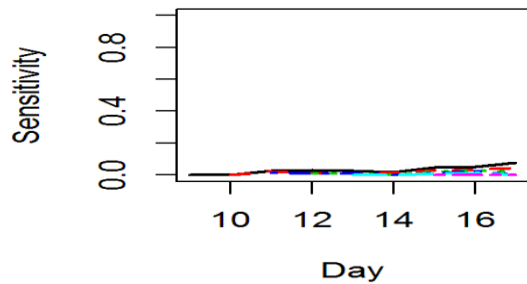

**Ovulation within 72**  
**Number of positives: 3**

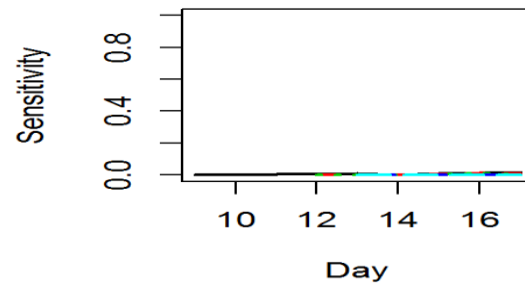

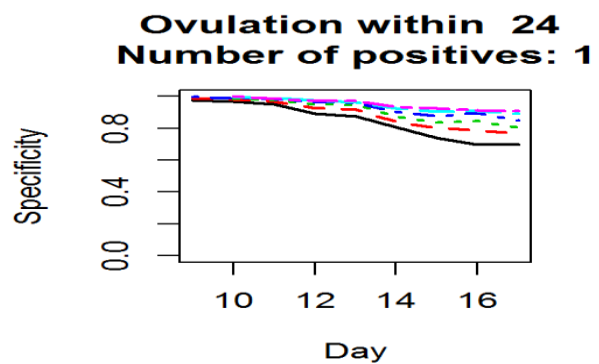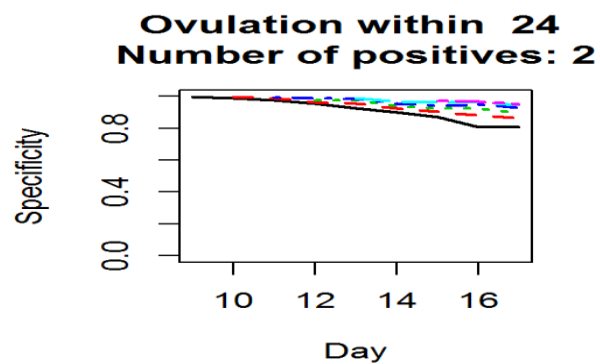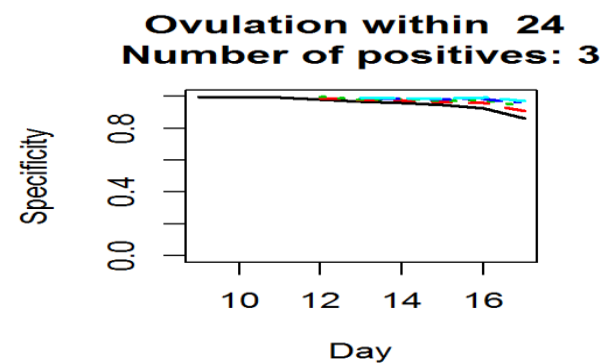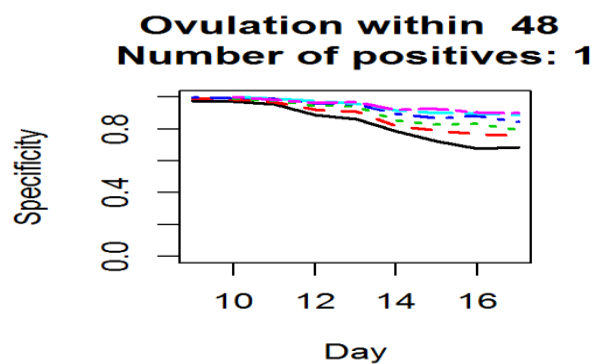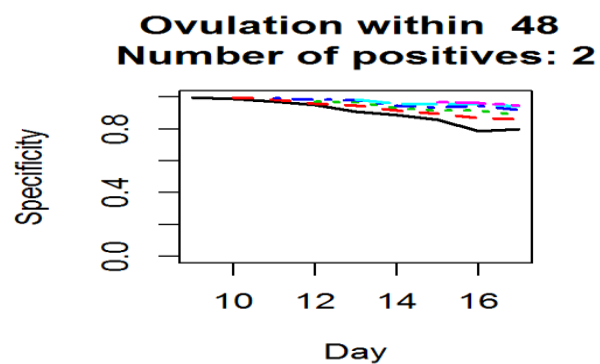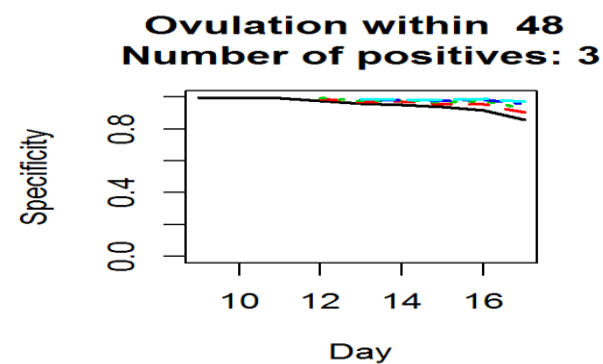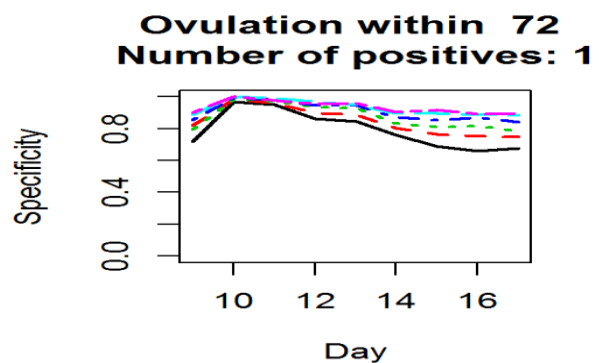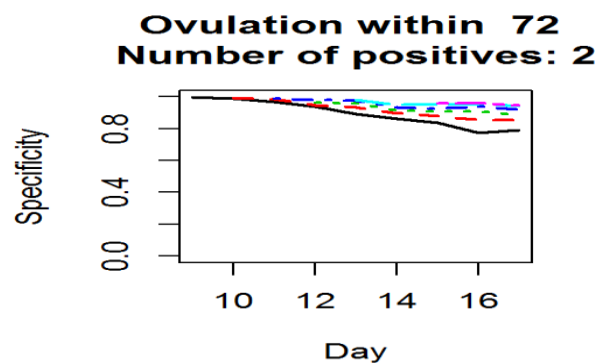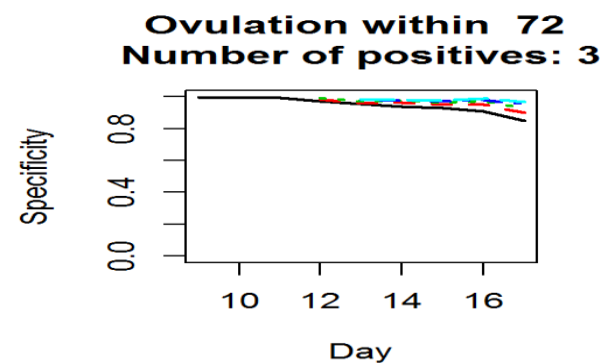

**Ovulation within 24**  
**Number of positives: 1**

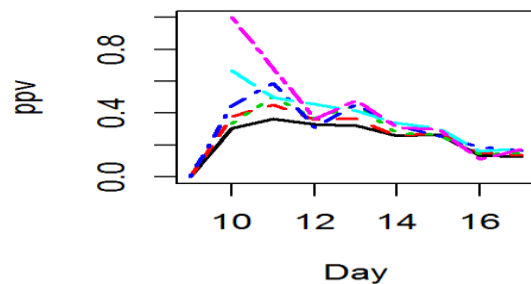

**Ovulation within 24**  
**Number of positives: 2**

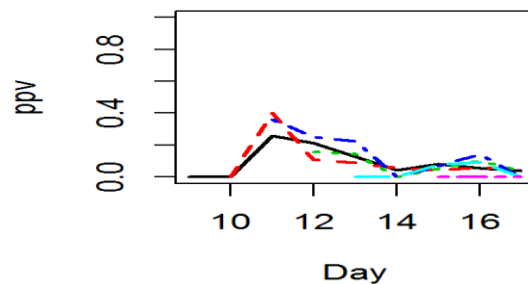

**Ovulation within 24**  
**Number of positives: 3**

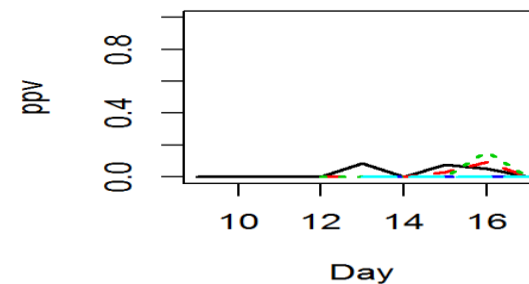

**Ovulation within 48**  
**Number of positives: 1**

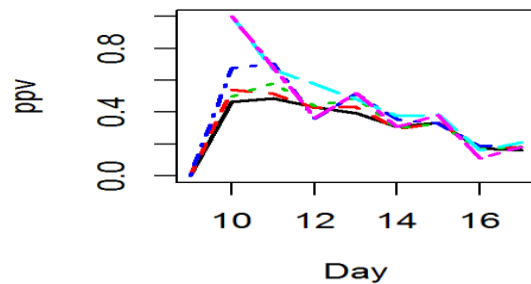

**Ovulation within 48**  
**Number of positives: 2**

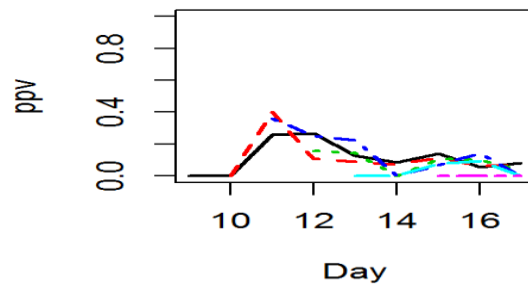

**Ovulation within 48**  
**Number of positives: 3**

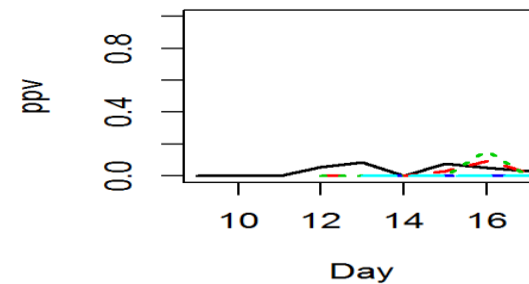

**Ovulation within 72**  
**Number of positives: 1**

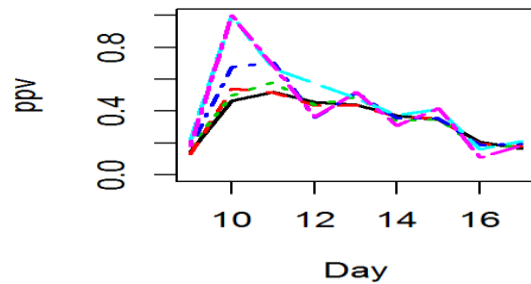

**Ovulation within 72**  
**Number of positives: 2**

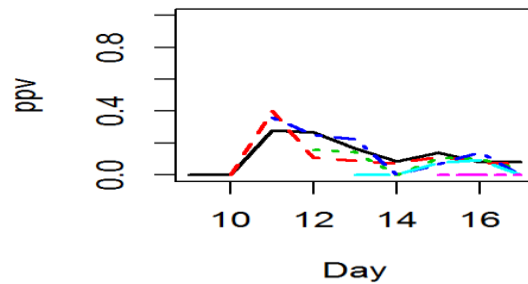

**Ovulation within 72**  
**Number of positives: 3**

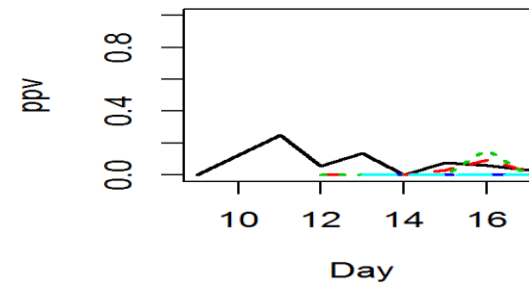

**Ovulation within 24**  
**Number of positives: 1**

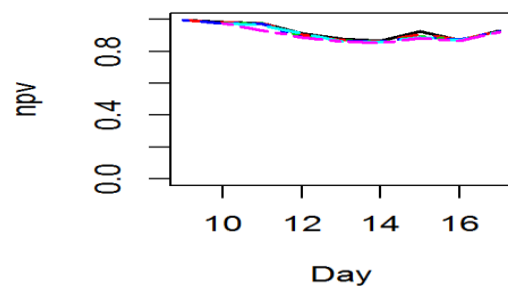

**Ovulation within 24**  
**Number of positives: 2**

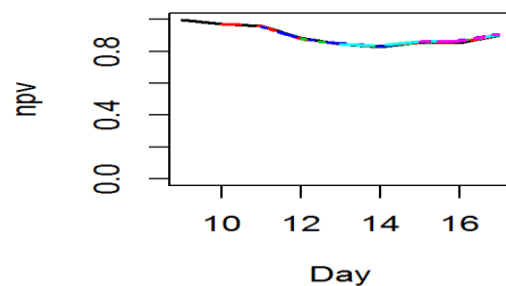

**Ovulation within 24**  
**Number of positives: 3**

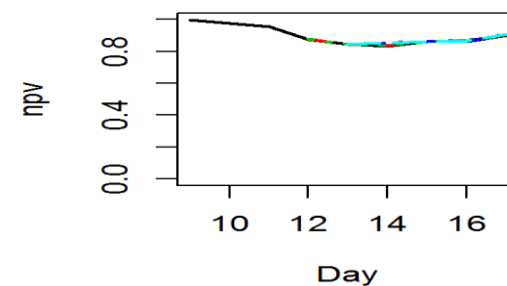

**Ovulation within 48**  
**Number of positives: 1**

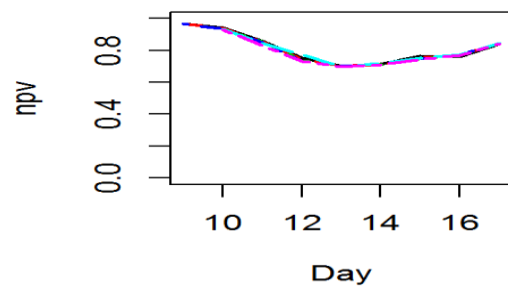

**Ovulation within 48**  
**Number of positives: 2**

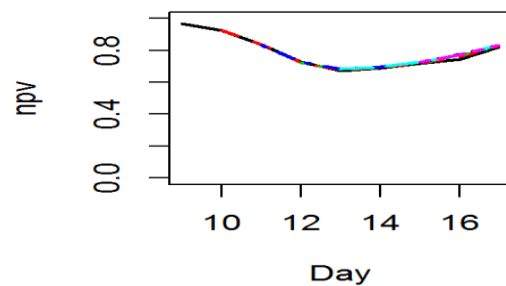

**Ovulation within 48**  
**Number of positives: 3**

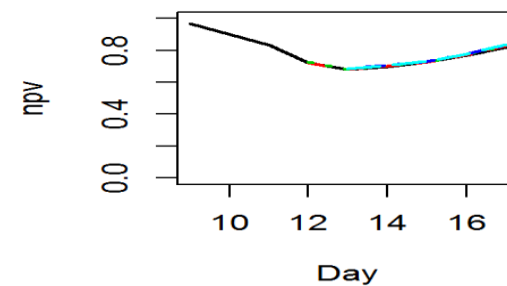

**Ovulation within 72**  
**Number of positives: 1**

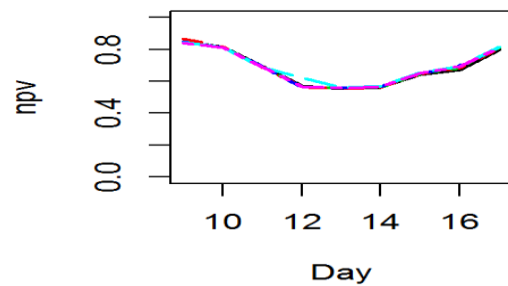

**Ovulation within 72**  
**Number of positives: 2**

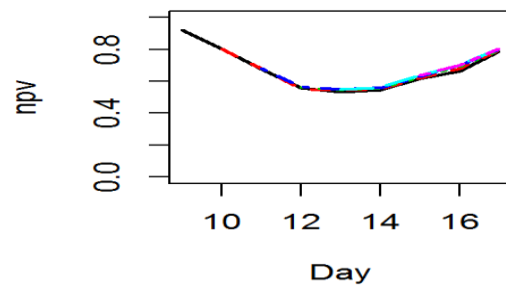

**Ovulation within 72**  
**Number of positives: 3**

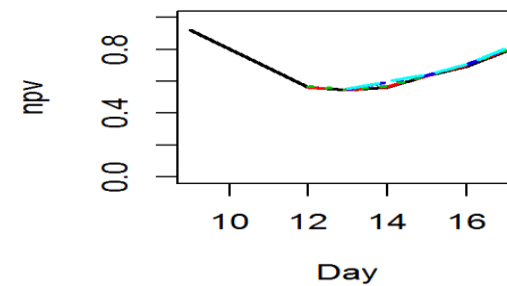

**Ovulation within 24**  
**Number of positives: 1**

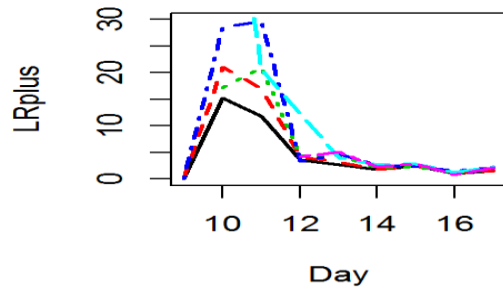

**Ovulation within 24**  
**Number of positives: 2**

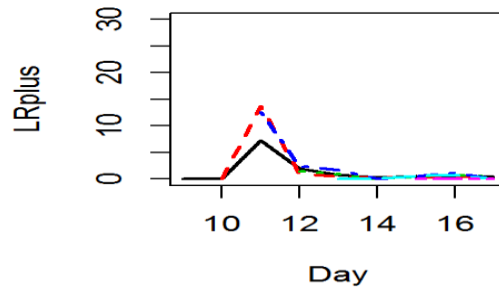

**Ovulation within 24**  
**Number of positives: 3**

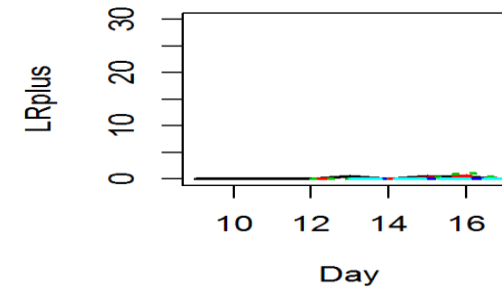

**Ovulation within 48**  
**Number of positives: 1**

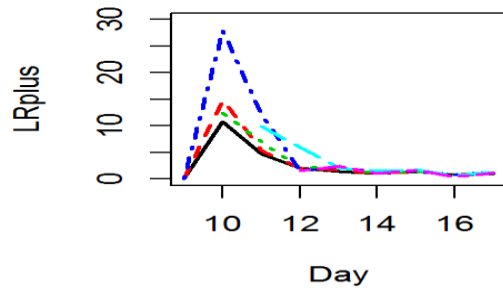

**Ovulation within 48**  
**Number of positives: 2**

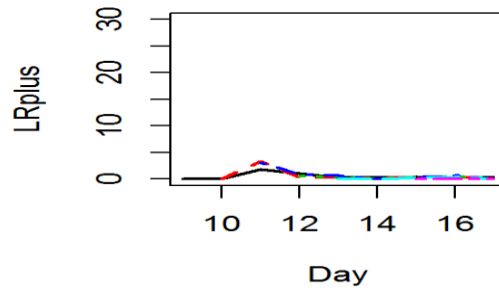

**Ovulation within 48**  
**Number of positives: 3**

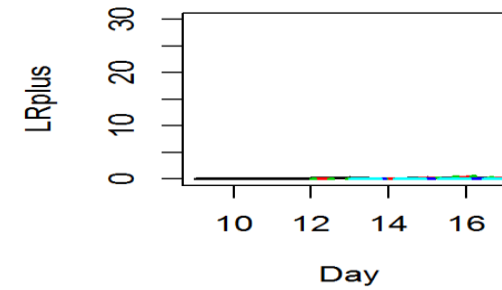

**Ovulation within 72**  
**Number of positives: 1**

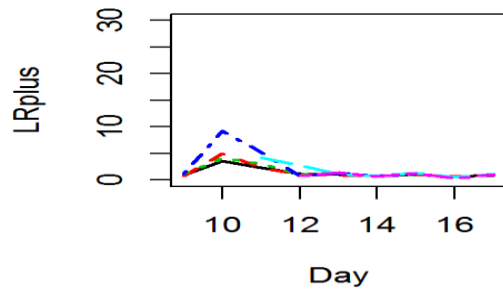

**Ovulation within 72**  
**Number of positives: 2**

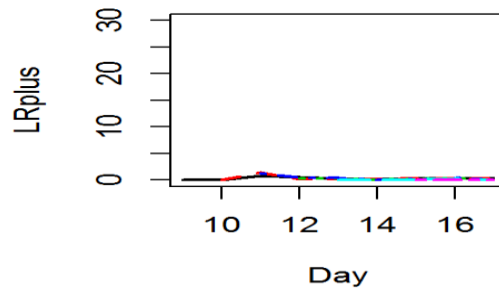

**Ovulation within 72**  
**Number of positives: 3**

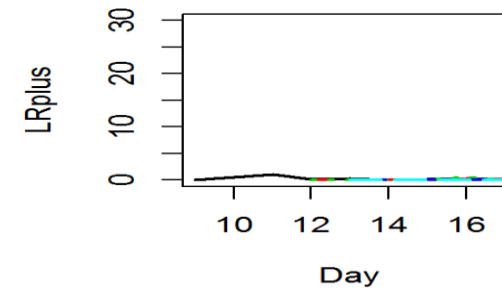

**Ovulation within 24**  
**Number of positives: 1**

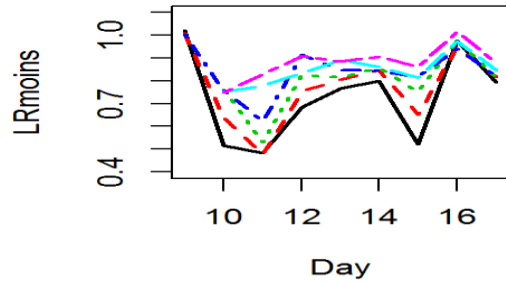

**Ovulation within 24**  
**Number of positives: 2**

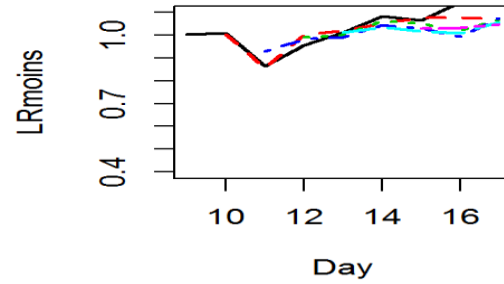

**Ovulation within 24**  
**Number of positives: 3**

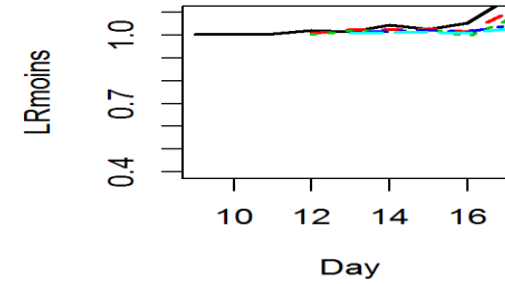

**Ovulation within 48**  
**Number of positives: 1**

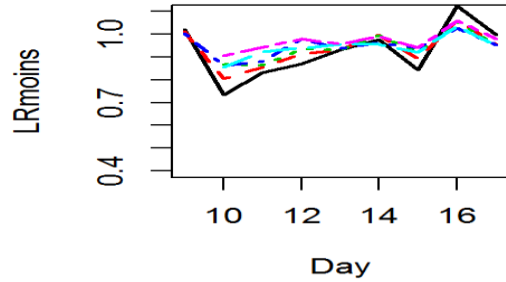

**Ovulation within 48**  
**Number of positives: 2**

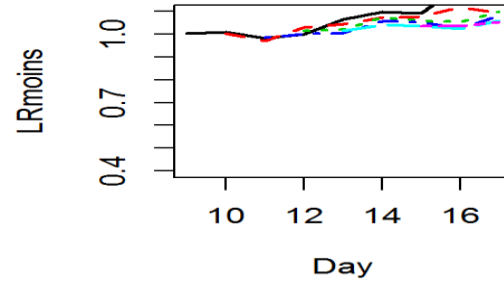

**Ovulation within 48**  
**Number of positives: 3**

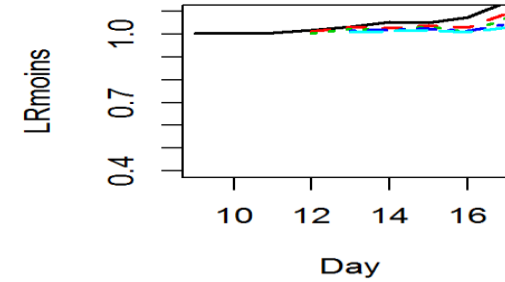

**Ovulation within 72**  
**Number of positives: 1**

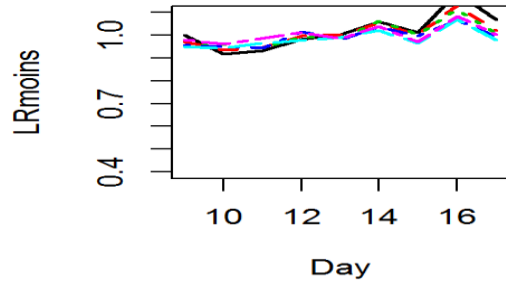

**Ovulation within 72**  
**Number of positives: 2**

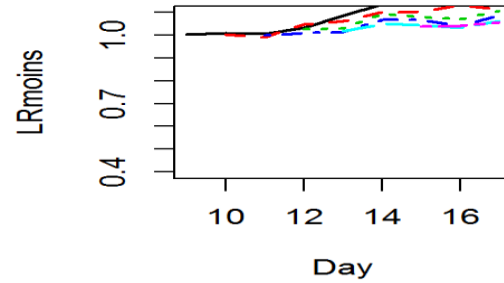

**Ovulation within 72**  
**Number of positives: 3**

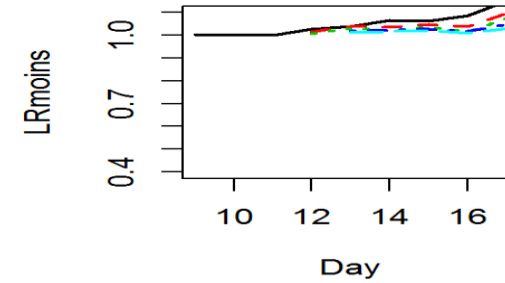

Supplement: Supplementary file [file 13699169]
